# Supplementary material for: The gluconeogenesis enzyme PCK2 has a non-enzymatic role in proteostasis in endothelial cells
Source: PubMed Central journal article supplement (PMC11116505; doi:10.1038/s42003-024-06186-6), 2024-05-23
Supplement: 42003_2024_6186_MOESM2_ESM.pdf [file 42003_2024_6186_MOESM2_ESM.pdf]

## Description of Additional Supplementary Files

**File name:** Supplementary Data 1

**Description:** The source data behind the quantified data in the main figures.
